# Supplementary material for: FABP4 Expression in Subcutaneous Adipose Tissue Is Independently Associated with Circulating Triglycerides in Obesity
Source: MDPI journal article supplement (doi:10.3390/jcm12031013), 2023-01-28
Supplement: s1 [file s1]

**Supplementary Table S1.** Clinical characteristics of the normotriglyceridemic, non-obese patients.

|                           | Non-Ob (n = 21)     |
|---------------------------|---------------------|
| Women                     | 13 (62%)            |
| Age (years)               | 60.81 ± 9.34        |
| Weight (kg)               | 74 (66.50-82.00)    |
| Height (m)                | 1.67 (1.54-1.73)    |
| BMI (kg/m²)               | 27.76 (25.91-28.87) |
| CUN-BAE Index             | 36.16 (30.79-42.09) |
| FPG                       | 93 (84-98)          |
| HbA1c (%)                 | 5.30 (4.60-7.60)    |
| T2D                       | 2 (10%)             |
| T2D medications           | 2 (10%)             |
| Insulin treatment         | 1 (5%)              |
| HTN                       | 4 (19%)             |
| HTN medications           | 4 (19%)             |
| AST (UI/l)                | 20 (18-27)          |
| ALT(UI/l)                 | 18 (15-36)          |
| GGT (UI/l)                | 27 (20-44)          |
| AST:ALT ratio             | 1.00 (0.58-1.42)    |
| MAFLD                     | 2 (10%)             |
| FIB4 score                | 1.15 (0.84-1.29)    |
| APRI score                | 0.20 (0.16-0.33)    |
| HSI Index                 | 37.72 (34.12-40.53) |
| TyG Index                 | 4.53 ± 0.27         |
| Total colessterol (mg/dl) | 27 (20-44)          |
| TG (mg/dl)                | 94 (73-136)         |
| HDL (mg/dl)               | 60.05 (55.00-84.00) |
| LDL (mg/dl)               | 104.5 ± 33.53       |
| Statins treatment         | 2 (10%)             |
| Creatinine (mg/dl)        | 0.77 (0.63-0.87)    |

Data are presented as the mean ± SD, median (IQR) or number (%). CUN-BAE Index, body adiposity estimator; hs-CRP, high-sensitivity C-reactive protein; FPG, fasting plasma glucose; HbA1c, glycosylated haemoglobin; T2D, type 2 diabetes; HTN, hypertension; AST, serum aspartate aminotransferase level; ALT, serum alanine aminotransferase; GGT, gamma-glutamyl transferase; MAFLD, metabolic-associated fatty liver disease; FIB-4, index for liver fibrosis; APRI, AST to platelet ratio index; HSI, hepatic steatosis index; TyG, triglyceride glucose index; FLI, fatty liver index; TG, serum triglycerides; HDL, serum high-density lipoprotein cholesterol; LDL, serum low-density lipoprotein cholesterol.

Supplementary Table S2. List of primers used in the study.

| GENE       | SEQUENCE | (5'-3')                   |
|------------|----------|---------------------------|
| ABCA1      | F        | GGAGGCCAGAATGACATCTTAG    |
| ABCA1      | R        | TTTCAGCCCCATTAACTCC       |
| ACOX1      | F        | ACCATTGCCATCCGATACAG      |
| ACOX1      | R        | GGTCTCCTTCATGTATGCGC      |
| ADFP/PLIN2 | F        | AGTATCCCTACCTGAAGTCTGTG   |
| ADFP/PLIN2 | R        | CCCCTTACAGGCATAGGTATTG    |
| ADIPOQ     | F        | ACAATGACTCCACCTTCACAG     |
| ADIPOQ     | R        | TTCCTAACCGTACTGAAAGCC     |
| ADIPOR1    | F        | TCATCTACCTCTCCATCGTCTG    |
| ADIPOR1    | R        | CACTCAAGCCAAGTCCCAG       |
| ADIPOR2    | F        | CAGCCATTATAGTCTCCAGTG     |
| ADIPOR2    | R        | CCGAGATGACATAGTGCAAGG     |
| ADRB1      | F        | CCGGGAACAGGAACACAC        |
| ADRB1      | R        | GAAAGCAAAAGGAAATATGTCTTGA |
| ADRB3      | F        | TTTTCTAAACCCCAGCCTTG      |
| ADRB3      | R        | CACGGCACCTGGACACTAC       |
| ANGPT1     | F        | TTAAAGGACTTACAGGGACAGC    |
| ANGPT1     | R        | GACCACATGCATCAAACCAC      |
| ANGPT2     | F        | CCACGAGACTTGAACCTCAGC     |
| ANGPT2     | R        | TGTGCTTGTCTTCCATAGCTAG    |
| ATG12      | F        | AATCAGTCCTTTGCTCCTTCC     |
| ATG12      | R        | GCAAGTTGATTTTCTTTGTGGTTC  |
| ATG5       | F        | AGCAACTCTGGATGGGATTG      |
| ATG5       | R        | AGGTCTTTCAGTCGTTGTCTG     |
| ATG7       | F        | TTTTGCTATCCTGCCCTCTG      |
| ATG7       | R        | GCTGTGACTCCTTCTGTTTGAC    |
| ATGL       | F        | CACTTCAACTCCAAGGACGAG     |
| ATGL       | R        | CTCATAGAGTGGCAGGTTGTC     |
| CD14       | F        | CAGAGGTTCCGAAGACTTATCG    |
| CD14       | R        | TTCGGAGAAGTTGCAGACG       |
| CD206/MRC1 | F        | GCAAAGTGGATTACGTGTCTTG    |
| CD206/MRC1 | R        | CTGTTATGTCGCTGGCAAATG     |
| CD68       | F        | ATGGCGGTGGAGTACAATG       |
| CD68       | R        | TGGACAGCTGGTGAAAGAATG     |
| CD80       | F        | CCATCCAAGTGTCATACCTC      |
| CD80       | F        | GCCAGCTCTTCAACAGAAAC      |
| CPT1A      | F        | TCCAGTTGGCTTATCGTGGTG     |
| CPT1A      | R        | CTAACGAGGGGTCGATCTTGG     |
| DGAT2      | F        | TCCGAATGCCTGTGTTGAG       |
| DGAT2      | R        | CAAATAGTCTATGGTGCCCGG     |
| DIO2       | F        | TCCAGTGTGGTGCATGTCTC      |
| DIO2       | R        | CTGGCTCGTGAAAGGAGGTC      |
| F13A1      | F        | ATCCCATCAAAGTCAGCCG       |
| F13A1      | R        | ATGTCAACGCTTCCAGTCC       |
| FABP4      | F        | CATGTGCAGAAATGGGATGG      |
| FABP4      | R        | AAC TTCAGTCCAGGTCAACG     |
| FASN       | F        | CAGAGTCGGAGAACTTGCAG      |
| FASN       | R        | GGAGGCATCAAACCTAGACAG     |
| HIF1A      | F        | AAGAACTTTTAGGCCGCTCA      |
| HIF1A      | R        | CAACCCAGACATATCCACCTC     |
| HSL/LIPE   | F        | TCATCTCCATCGACTACTCCC     |
| HSL/LIPE   | R        | AGATTCGTTCCCCTGTTGAG      |
| IL6        | F        | CAACCTGAACCTTCCAAAGATG    |
| IL6        | R        | ACCTCAAACCTCCAAAGACCAG    |
| IRS1       | F        | TCTGCTCAGCGTTGGTG         |
| IRS1       | R        | GTGCATGCTCTTGGGTTTG       |
| LEP        | F        | GCTTCAGGCTACTCCACAG       |
| LEP        | R        | CCTTCCCTTAACGTAGTCCTTG    |
| LEPR       | F        | TCAACCAGTACAATCCAGTCAC    |
| LEPR       | R        | TTTGGGCTCAGATATGGGATG     |
| LPL        | F        | GGACTGAGAGTGAAACCCATAC    |
| LPL        | R        | GGAAGGAGTAGGTCTTATTTGTGG  |
| MCP1/CCL2  | F        | CCTCCAGCATGAAAGTCTCTG     |
| MCP1/CCL2  | R        | TCTGCACTGAGATCTTCCTATTG   |
| MGLL       | F        | AGCATGCCAGAGGAAAGTTC      |
| MGLL       | R        | ATGGGACACAAAGATGAGGG      |

F, forward; R, reverse.

| GENE           | SEQUENCE | (5'-3')                     |
|----------------|----------|-----------------------------|
| MMP13          | F        | GGAATTGGTGATAAAGTAGATGCTG   |
| MMP13          | R        | ACGCGAACAATACGGTTACTC       |
| MMP14          | F        | GGATGGACACGGAGAATTTTG       |
| MMP14          | R        | TTTATCAGGAACAGAAGGCCG       |
| MMP15          | F        | CCCAAGCCCATCAGTGTC          |
| MMP15          | R        | CGCTCATTGTGCAATTTCCAG       |
| MOGAT1         | F        | GAAAGCCATCCACACTGTTG        |
| MOGAT1         | R        | GCCATACTTTCCTTTGTGTTCC      |
| MSR1           | F        | ATCTGTGAAATTTGATGCTCGC      |
| MSR1           | R        | CCAATGAGAGGGATGAGAACTG      |
| P16/CDKN2A     | F        | GATGTCGCACGGTACCTG          |
| P16/CDKN2A     | R        | TCTCTGGTTCCTTCAATCGGG       |
| P21/CDKN1A     | F        | GAAC TTCGACTTTGT CACCGAGAC  |
| P21/CDKN1A     | R        | TGGAGTGGTAGAAATCTGTCATGCT   |
| P53/TP53       | F        | CAGCACATGACGGAGTTGT         |
| P53/TP53       | R        | TCATCCAAATACTCCACACGC       |
| PAI-1/SERPINE1 | F        | GTGGACTTTTCAGAGGTGGAG       |
| PAI-1/SERPINE1 | R        | GAAGTAGAGGGCATTCACCAG       |
| PDGFRA         | F        | TTCCTCTGCCTGACATTGAC        |
| PDGFRA         | R        | GTCTTCAATGGTCTCGTCCTC       |
| PDGFRB         | F        | ATGTGACGGAGAGTGTGAATG       |
| PDGFRB         | R        | GCAGCTCAGCAAATTGTAGTG       |
| PGC1B          | F        | GTACATTCAAAATCTCTCCAGCGACAT |
| PGC1B          | R        | GAGGGCTCGTTGCGCTTCCTCAGGGC  |
| PLIN1          | F        | CATTGAGAAGGTGGTGGAGTAC      |
| PLIN1          | R        | GTGTATCGAGAGAGGGTGTTG       |
| PLIN2          | F        | AGTATCCCTACCTGAAGTCTGTG     |
| PLIN2          | R        | CCCCTTACAGGCATAGGTATTG      |
| PPARA          | F        | CTATCATTTGCTGTGGAGATCG      |
| PPARA          | R        | AAGATATCGTCCGGGTGGTT        |
| PPARG          | F        | GTCGGTTTCAGAAATGCCTTG       |
| PPARG          | R        | GCTGGTCGATATCACTGGAG        |
| PPARGC1A/PGC1A | F        | CAGGCAGTAGATCCTCTTCAAG      |
| PPARGC1A/PGC1A | R        | TCCTCGTAGCTGTCATACCTG       |
| PTEN           | F        | TTTGAAGACCATAACCCACCAC      |
| PTEN           | R        | ATTACACCAGTTCGTCCCTTTC      |
| RPL6           | F        | CCTTAATTCTCTTTCCCATCTTGC    |
| RPL6           | R        | TTCTTGGCTTCGGGTTTCTT        |
| SLC2A1/GLUT1   | F        | TCATCGTGGCTGAACTCTTC        |
| SLC2A1/GLUT1   | R        | GATGAAGACGTAGGGACCAC        |
| SLC2A4/GLUT4   | F        | ACTGGACGAGCAACTTCATC        |
| SLC2A4/GLUT4   | R        | GAGGACCGCAAATAGAAGGAA       |
| SOD2           | F        | GACAAACCTCAGCCCTAACG        |
| SOD2           | R        | GAAACCAAGCCAACCCCAAC        |
| SREBF1         | F        | TTCTGACAGCCATGAAGACAG       |
| SREBF1         | R        | CCGCATCTACGACCAGTG          |
| TGFB1          | F        | TTGATGTCACCGGAGTTGTG        |
| TGFB1          | R        | GTAGTGAACCCGTTGATGTCC       |
| TNFA           | F        | AGGTCTACTTTGGGATCATTGC      |
| TNFA           | R        | GAAGAGGTTGAGGGTGTCTG        |
| UCP1           | F        | GGACTACTCCCAATCTGATGAG      |
| UCP1           | R        | AAATCCAGCGATAAGAGCCG        |
| UCP2           | F        | TCCTGAAAGCCAACCTCATG        |
| UCP2           | R        | GGCAGAGTTCATGTATCTCGTC      |
| UCP3           | F        | AGAAAATACAGCGGGACTATGG      |
| UCP3           | R        | CTTGAGGATGTCGTAGGTCAC       |
| VEGFA          | F        | AGTCCAACATCACCATGCAG        |
| VEGFA          | R        | TTCCCTTTCCTCGAACTGATTT      |
| VEGFB          | F        | CTTAGAGCTCAACCCAGACAC       |
| VEGFB          | R        | ACCCTGCTGAGTCTGAAAAG        |
| VEGFR1         | F        | TCCCTCAACCTACAATCAAGTG      |
| VEGFR1         | R        | GCTCTCAATTCTGTTTCCCATG      |
| VEGFR2         | F        | CATTTCAAAGGAGAAGCAGAGC      |
| VEGFR2         | R        | GAGGAATGGCATAGACCGTAC       |
